# Supplementary material
Source: Springer Nature journal article supplement (https://www.springermedizin.de/resource/supplementary/12906_2011_511_MOESM3_ESM.pdf/9520226)

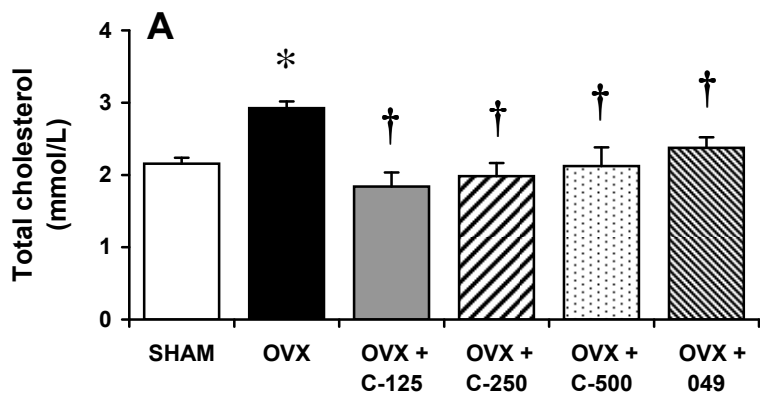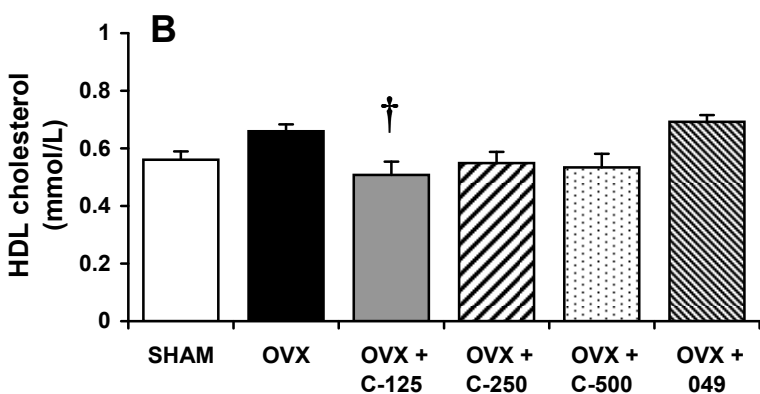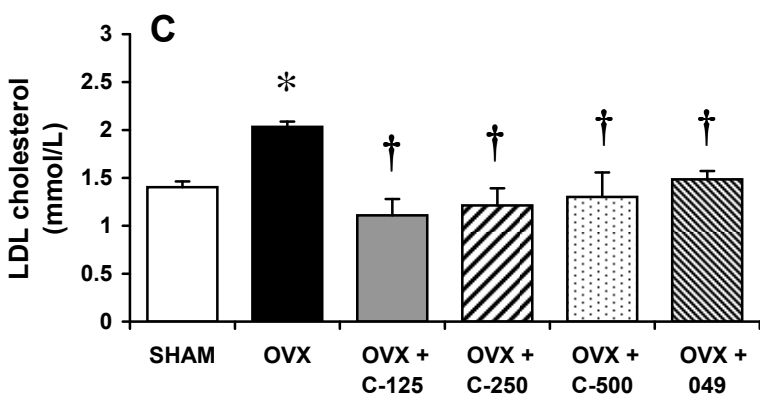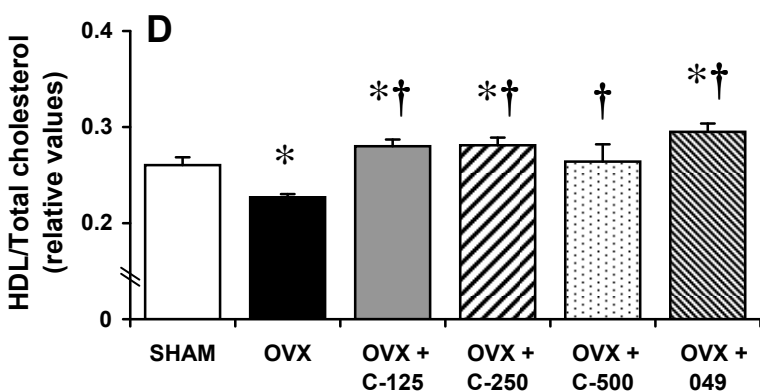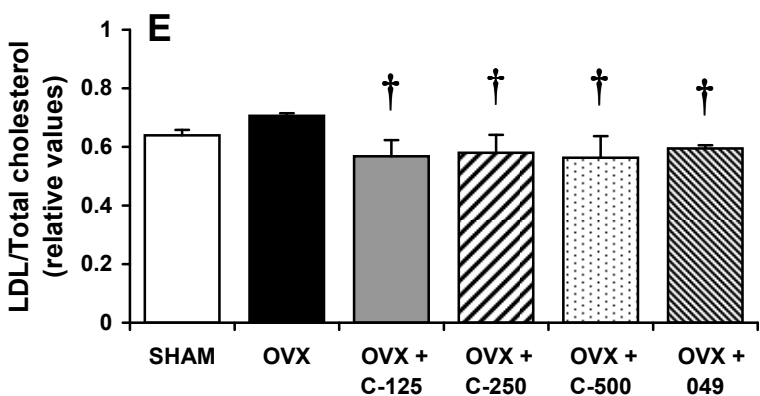

Supplement: MOESM3 [file 9520226]
